# Supplementary material for: Thermally activated reversible shape switch of polymer particles
Source: Royal Society of Chemistry journal article supplement (doi:10.1039/c4tb01155d), 2014-01-01
Supplement: c4tb01155d2.pdf [file c4tb01155d2.pdf]

# Thermally Activated Reversible Shape Switch of Polymer Particles

Tao Gong, Kun Zhao, Wenxi Wang, Hongmei Chen, Lin Wang, Shaobing Zhou\*

## Support Information (SI):

### Supplementary Figure captions:

**Fig.S1.** DSC curves of c-6A PEG, c-6A PEG-PCL with the  $M_w$  of each PCL arm of 1000 g mol<sup>-1</sup>, 2000 g mol<sup>-1</sup> and 3000 g mol<sup>-1</sup>.

**Fig.S2.** TGA profiles of c-6A PEG-PCL(2000) immersed in 60 °C H<sub>2</sub>O for 1 h before test.

**Fig.S3.** Series of photographs macroscopically showing the multiple shape-recovery process of the c-6A PEG-PCL(2000) at 0 °C, 37 °C, 39 °C and 42 °C.

**Fig.S4.** Cross-linking degree versus cross-linking time.

**Fig.S5.** Size distribution of microspheres and micro-ellipsoids.

**Fig.S6.** The effect of stretching strength or degree of tensile on particle shape (AR ratio), and shape recovery ratio of microparticles.

**Fig.S7.** SEM images showing microscopically reversible shape memory recovery process of the particles.

**Fig. S8.** Gel fraction, shape fixed ratio and shape recovery ratio of c-6A PEG-PCL with different ratio of 6A PEG-PCL to 6A PEG-PCL-AC.

**Fig.S9.** The effect of phagocytosis with microspheres and microellipsoids.

**Movie S1.** The reversible two-way shape memory recovery process.

**Table S1:** Characterization of the polymers

| Samples       | Rate of productivity | Hydroxyl Value(mg KOH/g) | $M_{n,NMR}(1 \times 10^4)$ | $M_{n,GPC}(1 \times 10^4)$ | $M_{w,GPC}(1 \times 10^4)$ | $M_{w,GPC}/M_{n,GPC}$ | PDI  |
|---------------|----------------------|--------------------------|----------------------------|----------------------------|----------------------------|-----------------------|------|
| 6A PEG        | ---                  | $54 \pm 3.2$             | 0.6                        | 0.73                       | 0.78                       | 1.06                  | 1.12 |
| 6A PEG-PCL    | 87%                  | $17.3 \pm 2.4$           | 1.89                       | 2.02                       | 2.23                       | 1.10                  | 1.19 |
| 6A PEG-PCL-AC | 85%                  | $3 \pm 1.2$              | 1.94                       | 2.14                       | 2.34                       | 1.09                  | 1.19 |

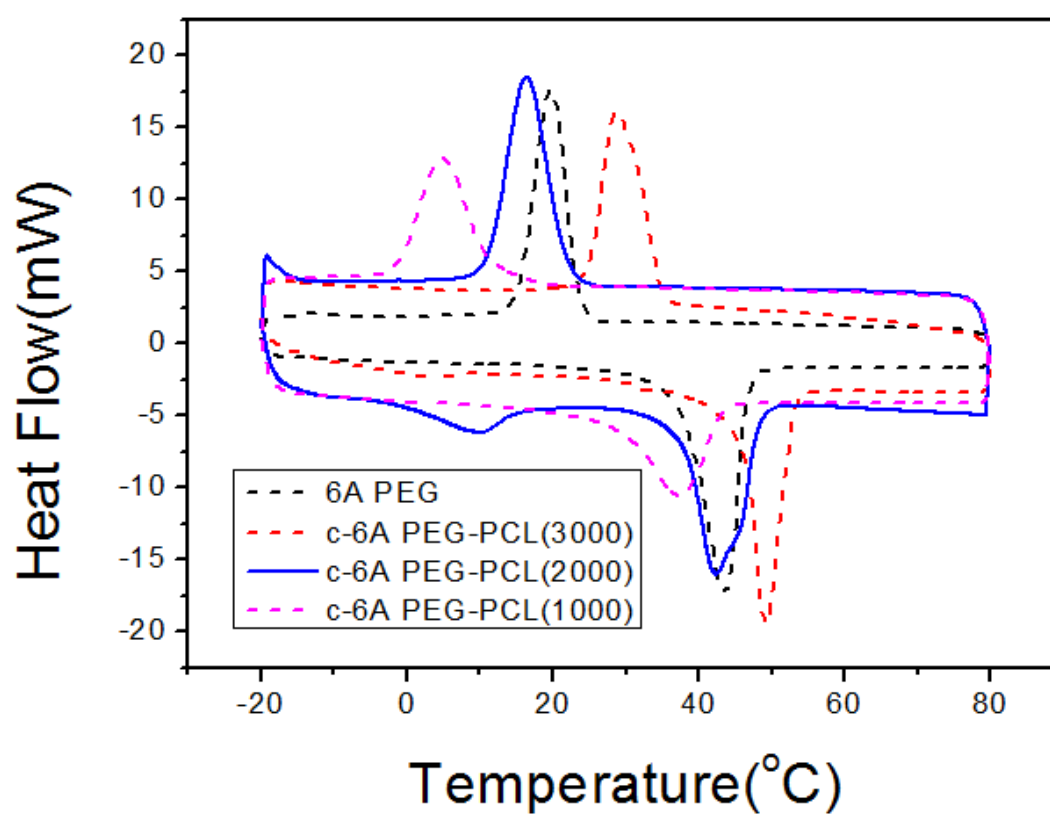

**Fig. S1.** DSC curves of c-6A PEG, c-6A PEG-PCL with the  $M_w$  of each PCL arm of  $1000 \text{ g mol}^{-1}$ ,  $2000 \text{ g mol}^{-1}$  and  $3000 \text{ g mol}^{-1}$ .

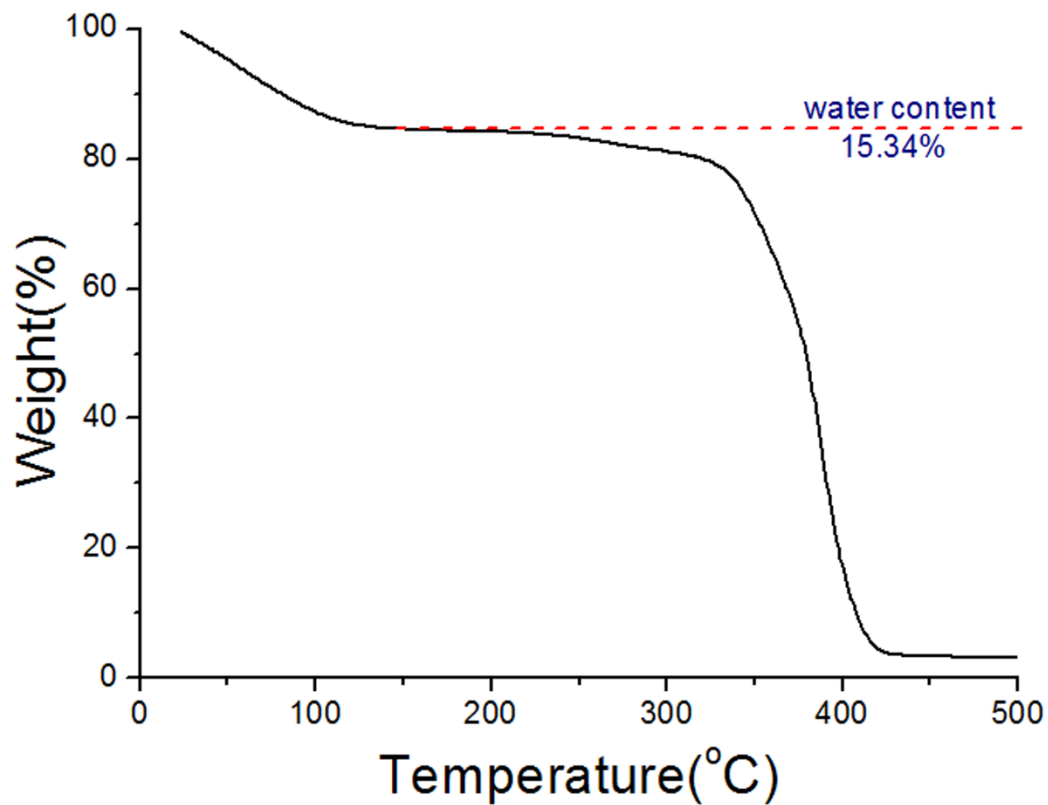

**Fig.S2.** TGA profiles of c-6A PEG-PCL(2000) immersed in 60°C H<sub>2</sub>O for 1 h before test.

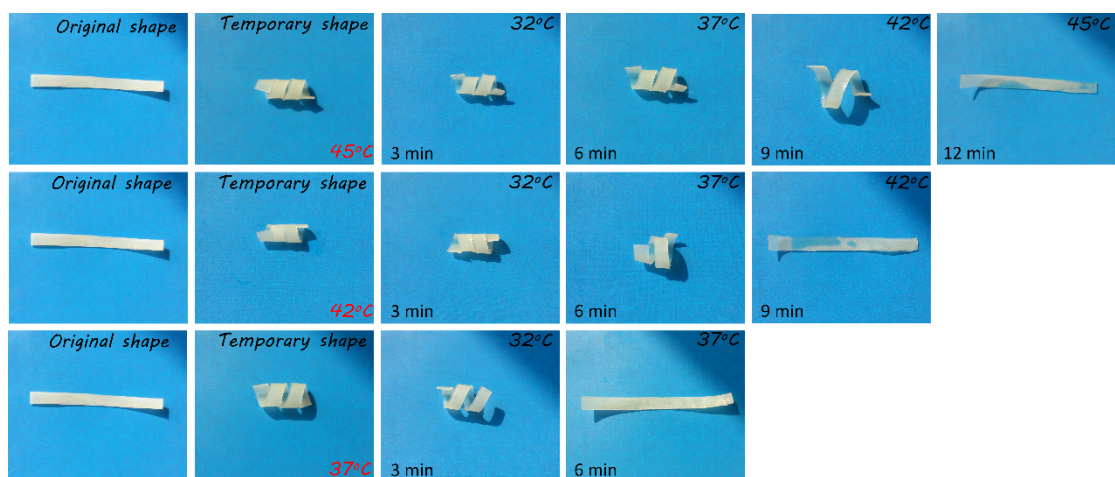

**Fig.S3.** Series of photographs macroscopically showing the multiple shape-recovery process of the c-6A PEG-PCL(2000) at 0 °C, 37 °C, 39 °C and 42 °C.

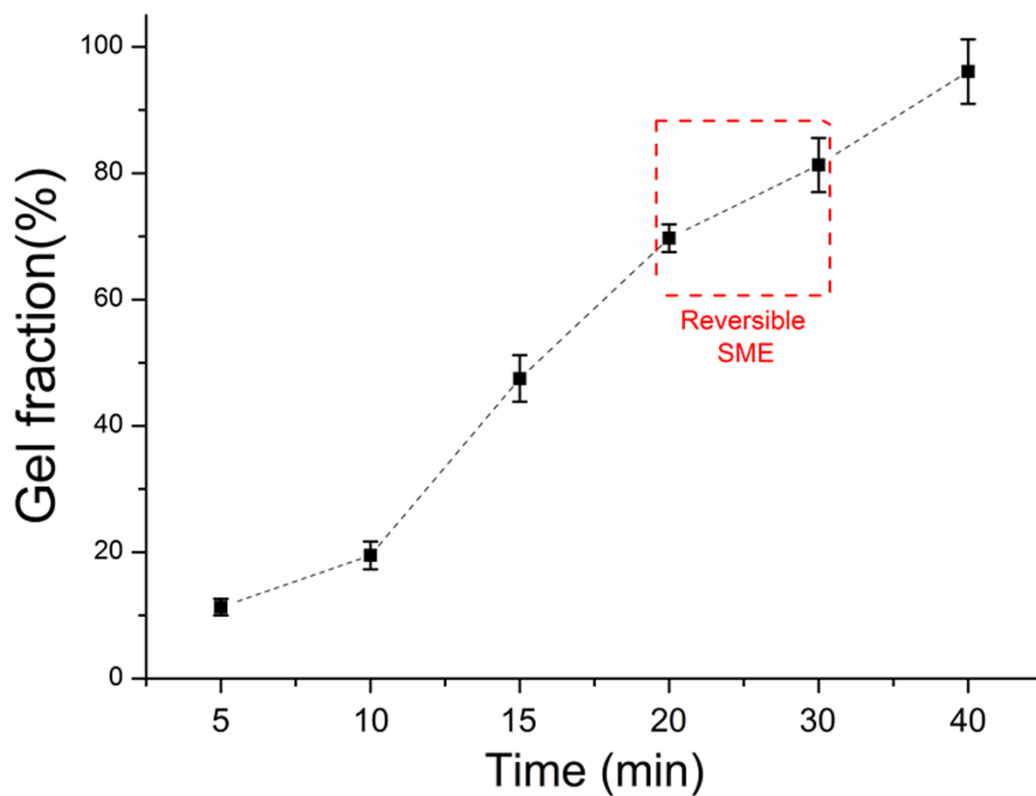

**Fig.S4.** Cross-linking degree versus cross-linking time.

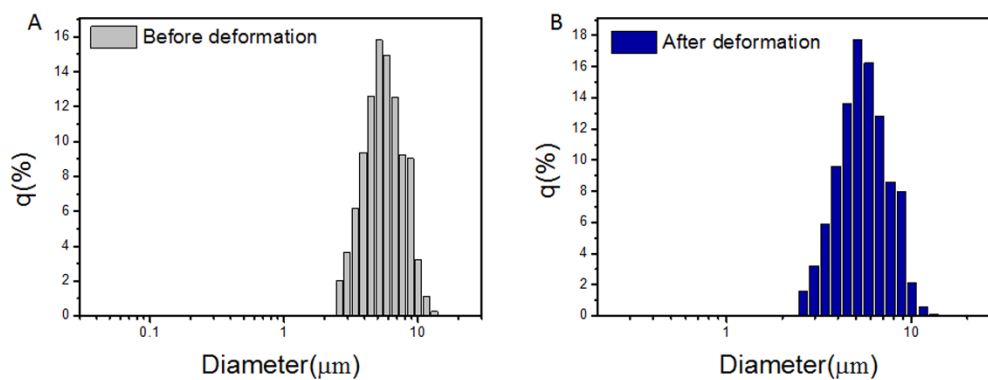

**Fig.S5.** Size distribution of microspheres and micro-ellipsoids.

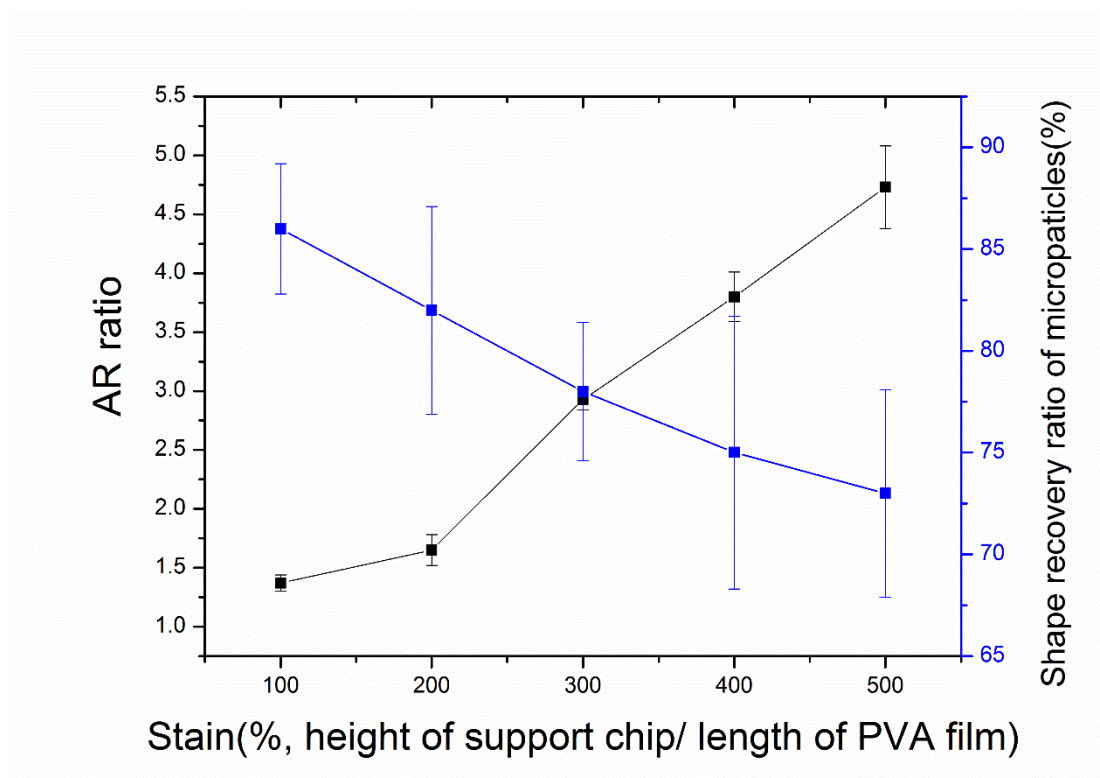

**Fig.S6.** The effect of stretching strength or degree of tensile on particle shape (AR ratio), and shape recovery ratio of microparticles.

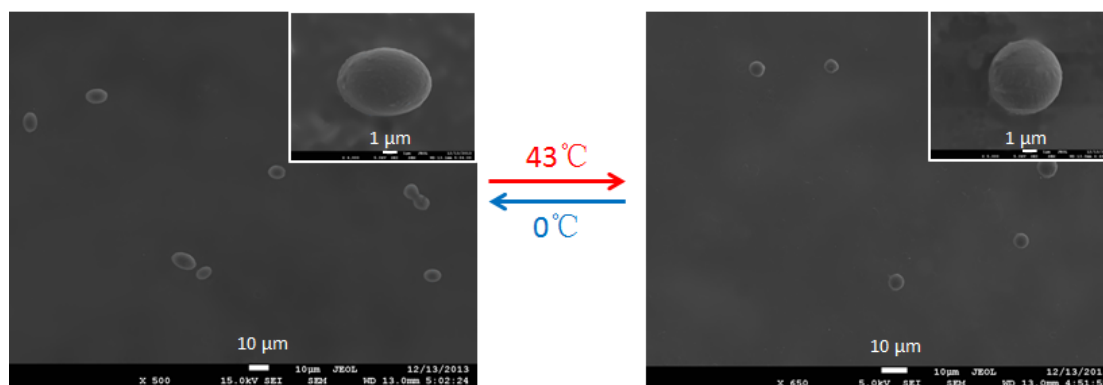

**Fig.S7.** SEM images showing microscopically reversible shape memory recovery process of the particles.

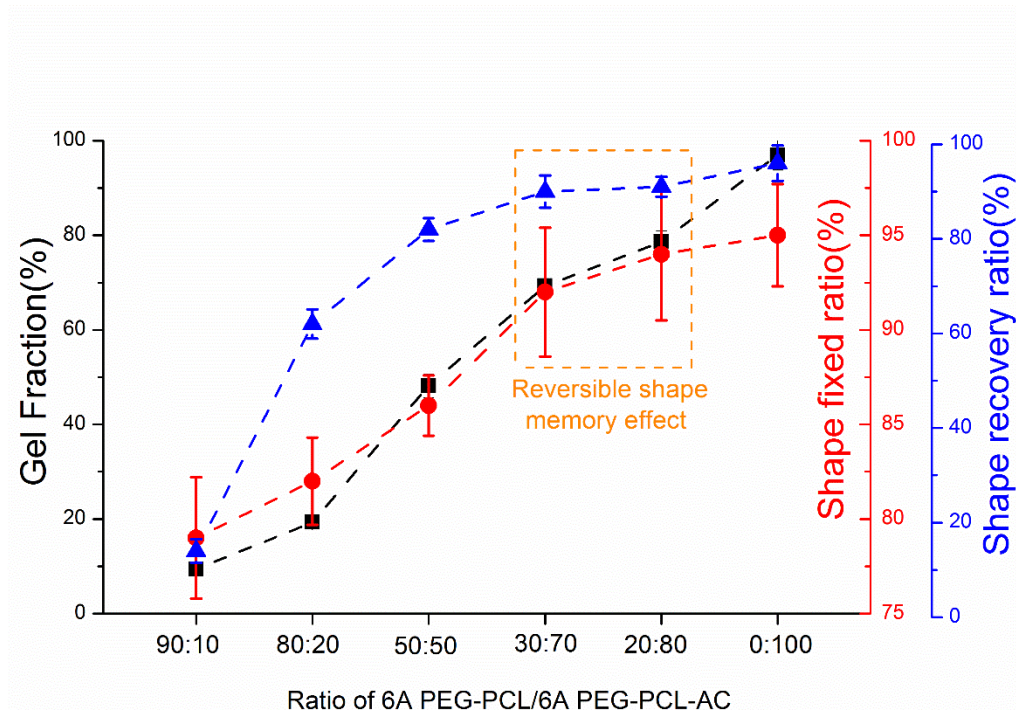

**Fig. S8.** Gel fraction, shape fixed ratio and shape recovery ratio of c-6A PEG-PCL with different ratio of 6A PEG-PCL to 6A PEG-PCL-AC.

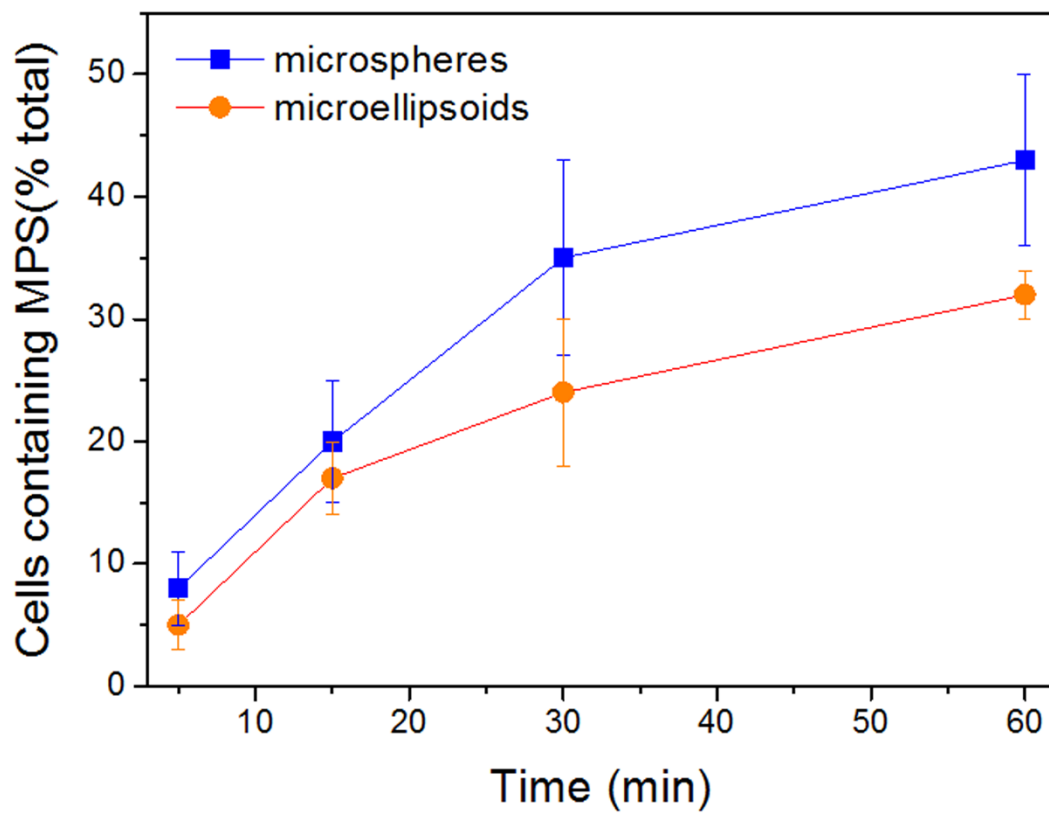

**Fig.S9.** The effect of phagocytosis with microspheres and microellipsoids.

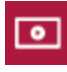

6-arm.wmv

**Movie S1.** The reversible two-way shape memory recovery process.
